# Supplementary material
Source: MDPI journal article supplement (https://www.mdpi.com/2313-0105/8/12/284)
Supplement: s1 [file s1]

# Deep eutectic solvent (DES) for *in situ* templating carbon material: carbon characterization and application in supercapacitors containing multivalent ions

Nikola Zdolšek<sup>1\*</sup>, Bojan Janković<sup>1</sup>, Miloš Milović<sup>2</sup>, Snežana Brković<sup>1</sup>, Jugoslav Krstić<sup>3</sup>, Ivana Perović<sup>1</sup> and Milica Vujković<sup>4</sup>

<sup>1</sup>Department of Physical Chemistry, “Vinča” Institute of Nuclear Sciences—National Institute of the Republic of Serbia, University of Belgrade, Mike Petrovića Alasa 12–14, 11351 Belgrade, Serbia;

<sup>2</sup>Institute of Technical Sciences of SASA, Knez Mihailova 35, 11000 Belgrade, Serbia;

<sup>3</sup>Center for Catalysis and Chemical Engineering, Institute for Chemistry, Technology and Metallurgy, University of Belgrade, Njegoševa 12, 11000, Belgrade, Serbia;

<sup>4</sup>Faculty of Physical Chemistry, University of Belgrade, Studentski Trg 12–14, 11158, Belgrade, Serbia.

\* Correspondence: [zdolsek@vin.bg.ac.rs](mailto:zdolsek@vin.bg.ac.rs)

## Supplementary Materials

a)

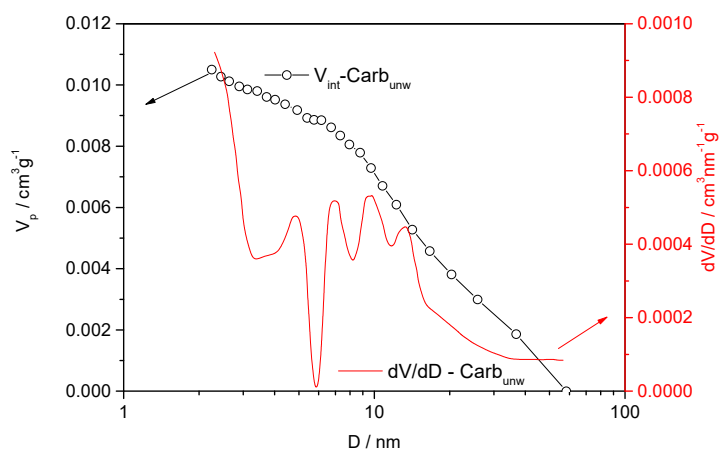

b)

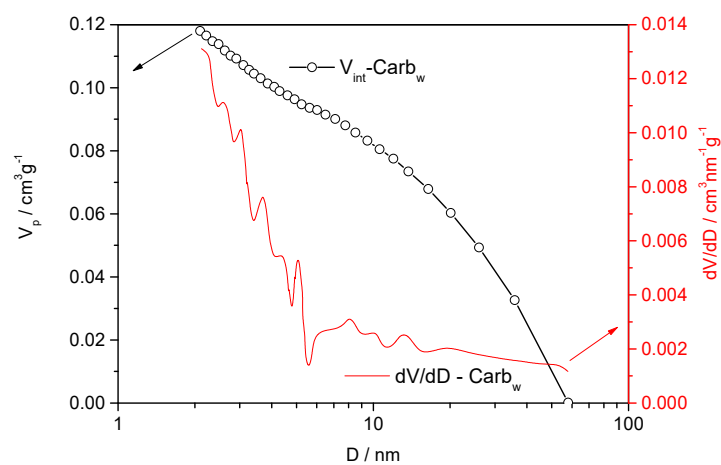

c)

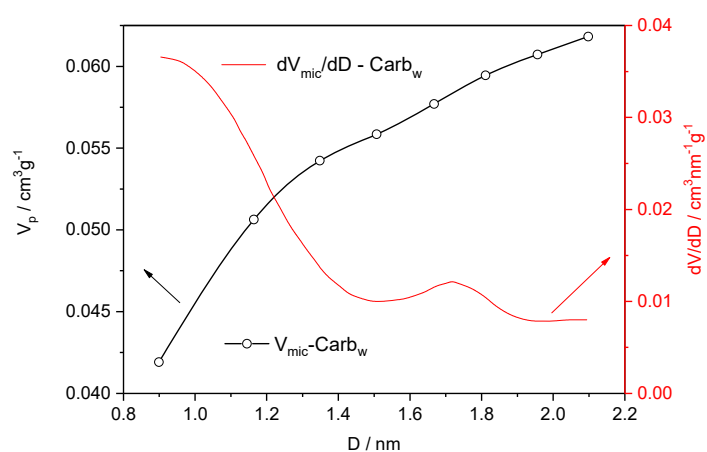

**Figure S1.** Pore size distribution curves for a) Carb<sub>unw</sub> mesopores, b) Carb<sub>w</sub> mesopores and c) Carb<sub>w</sub> micropores.

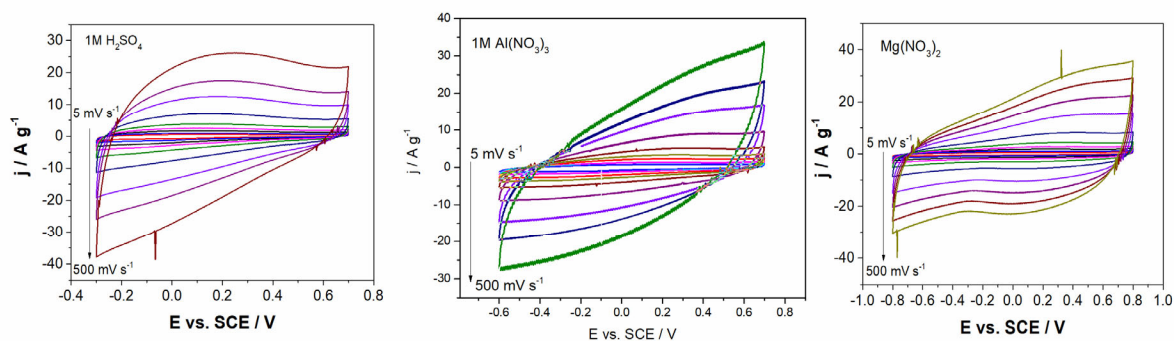

**Figure S2.** CV curves of carbon electrode in all investigated electrolytes at different scan rates

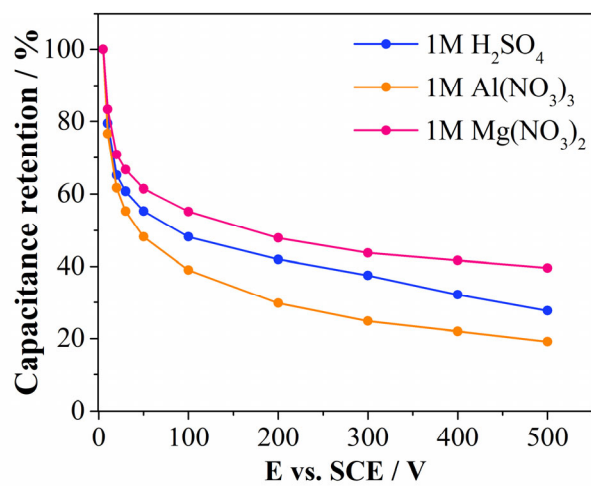

**Figure S3.** Capacitance retention.
